# Supplementary material for: The Multifaceted Gene 275 Embedded in the PKS-PTS Gene Cluster Was Involved in the Regulation of Arthrobotrisin Biosynthesis, TCA Cycle, and Septa Formation in Nematode-Trapping Fungus Arthrobotrys oligospora
Source: MDPI journal article supplement (doi:10.3390/jof8121261), 2022-11-29
Supplement: s1 [file s1]

## Supporting Information

The Multifaceted Gene 275 Embedded in the PKS-PTS Gene Cluster  
was Involved in the Regulation of Nematicidal Activity, Arthrobotrisin  
Biosynthesis, TCA Cycle, and Septa Formation of Nematode-Trapping  
Fungus *Arthrobotry oligospora*

Jiao Zhou<sup>1,2</sup>, Qun-Fu Wu,<sup>1,2</sup> Shu-Hong Li,<sup>1</sup> Jun-Xian Yan,<sup>1</sup> Li Wu,<sup>1</sup> Qian-Yi Cheng,<sup>1</sup>  
Zhi-Qiang He,<sup>1</sup> Xu-Tong Yue,<sup>1</sup> Ke-Qin Zhang,<sup>1</sup> Long-Long Zhang,<sup>1</sup> Xue-Mei Niu,<sup>1\*</sup>

State Key Laboratory for Conservation and Utilization of Bio-Resources & Key Laboratory  
for Microbial Resources of the Ministry of Education, School of life Sciences, Yunnan  
University, Kunming 650091, People's Republic of China

Jiao Zhou, Qun-Fu Wu, contributed equally to this work.

**Table S1. List of primers for 275**

| Gene | Primer    | Sequence (5'-3')                           |
|------|-----------|--------------------------------------------|
| 275  | 275up-F   | GAGCTCGGTACCAAGGCCCGGGACTTATCAATTAGGGCTCAC |
|      | 275up-R   | AGGCCTGATCATCGATGGGCCCAACAAATCGGAATAGGGT   |
|      | 275down-F | TCTAGAGGATCCCCCGACTAGTCCCAGCATATTAGATAGAG  |
|      | 275down-R | CACGAAGCTTGCATGCCTGCAGGTTCTCACATAATCCGTCA  |
|      | 275yz-5f  | CGTGAATTCAGCCTCATGAGC                      |
|      | 275yz-3r  | AGGTACCACGTTGACGAAGG                       |

**Table S2. List of primers for OE-275**

| Gene | Primer              | Sequence (5'-3')                        |
|------|---------------------|-----------------------------------------|
| 275  | 275-5f              | ATGTTCACTTCTCTTCGCTTTCTATG              |
|      | 275-3r              | TTATAGAATAACACAATCACTTCCAAGTTTGGATAGAG  |
|      | PUC-5f              | GAAGAGAAGTGAACATATCGATGCTTGGGTAGAATAGGT |
|      | PUC-3r              | TGTGTTATTCTATAACCACTTAACGTTACTGAAATCATC |
|      | 275yz-5f            | AAGCAAGGTAAGTGAACGACCC                  |
|      | 275yz-3r            | AACTCCGGAGCTGACATCG                     |
|      | 275RT-5f            | CTCTAAGTTCAAGCATCGGAC                   |
|      | 275RT-3r            | ACGGATAGAGGAGGCAATG                     |
|      | $\beta$ -tubulin-5f | CCACCTTCGTCGGTAACTC                     |
|      | $\beta$ -tubulin-3r | TCGTCCATACCCTCACCAG                     |
